# Supplementary material for: Thermoregulatory, Cardiovascular and Perceptual Responses of Spectators of a Simulated Football Match in Hot and Humid Environmental Conditions
Source: MDPI journal article supplement (doi:10.3390/sports11040078), 2023-03-31
Supplement: s1 [file s1]

**Supplementary Table S1.** Sex differences in thermal and cardiovascular outcome parameters

|                     | Total group<br>(n=48) | Males<br>(n=30) | Females<br>(n=18) | P-value |
|---------------------|-----------------------|-----------------|-------------------|---------|
| Age (years)         | 43 ± 19               | 47 ± 18         | 36 ± 18           | 0.04    |
| Baseline Tcore (°C) | 37.3 ± 0.4            | 37.1 ± 0.7      | 37.5 ± 0.3        | <0.004  |
| Peak Tcore (°C)     | 37.5 ± 0.3            | 37.4 ± 0.3      | 37.6 ± 0.3        | 0.10    |
| ΔTcore (°C)         | 0.2 ± 0.2             | 0.3 ± 0.0       | 0.1 ± 0.1         | 0.001   |
| Baseline Tskin (°C) | 32.8 ± 0.8            | 32.9 ± 0.9      | 32.9 ± 0.6        | 0.92    |
| Peak Tskin (°C)     | 35.4 ± 0.3            | 35.4 ± 0.3      | 35.5 ± 0.3        | 0.67    |
| ΔTskin (°C)         | 2.6 ± 0.8             | 2.5 ± 0.9       | 2.6 ± 0.6         | 0.80    |
| Baseline HR (bpm)   | 76 ± 15               | 72 ± 16         | 81 ± 11           | 0.041   |
| Peak HR (bpm)       | 81 ± 14               | 78 ± 14         | 87 ± 12           | 0.05    |
| ΔHR (bpm)           | 6 ± 7                 | 6 ± 8           | 4 ± 5             | 0.28    |
| Baseline MAP (mmHg) | 96 ± 8                | 100 ± 10        | 93 ± 9            | 0.017   |
| Peak MAP (mmHg)     | 100 ± 8               | 103 ± 9         | 97 ± 10           | 0.033   |
| ΔMAP (mmHg)         | 4 ± 5                 | 3 ± 4           | 4 ± 5             | 0.58    |

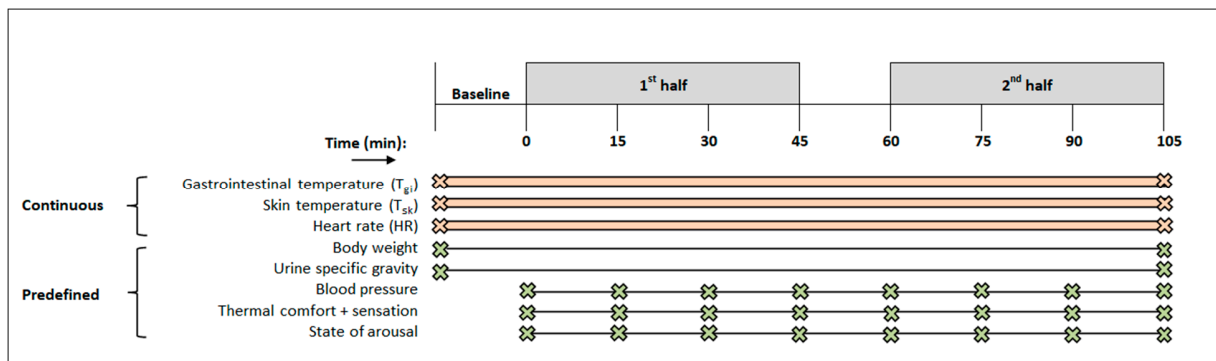**Supplementary Figure S1.** Overview of the study protocol.

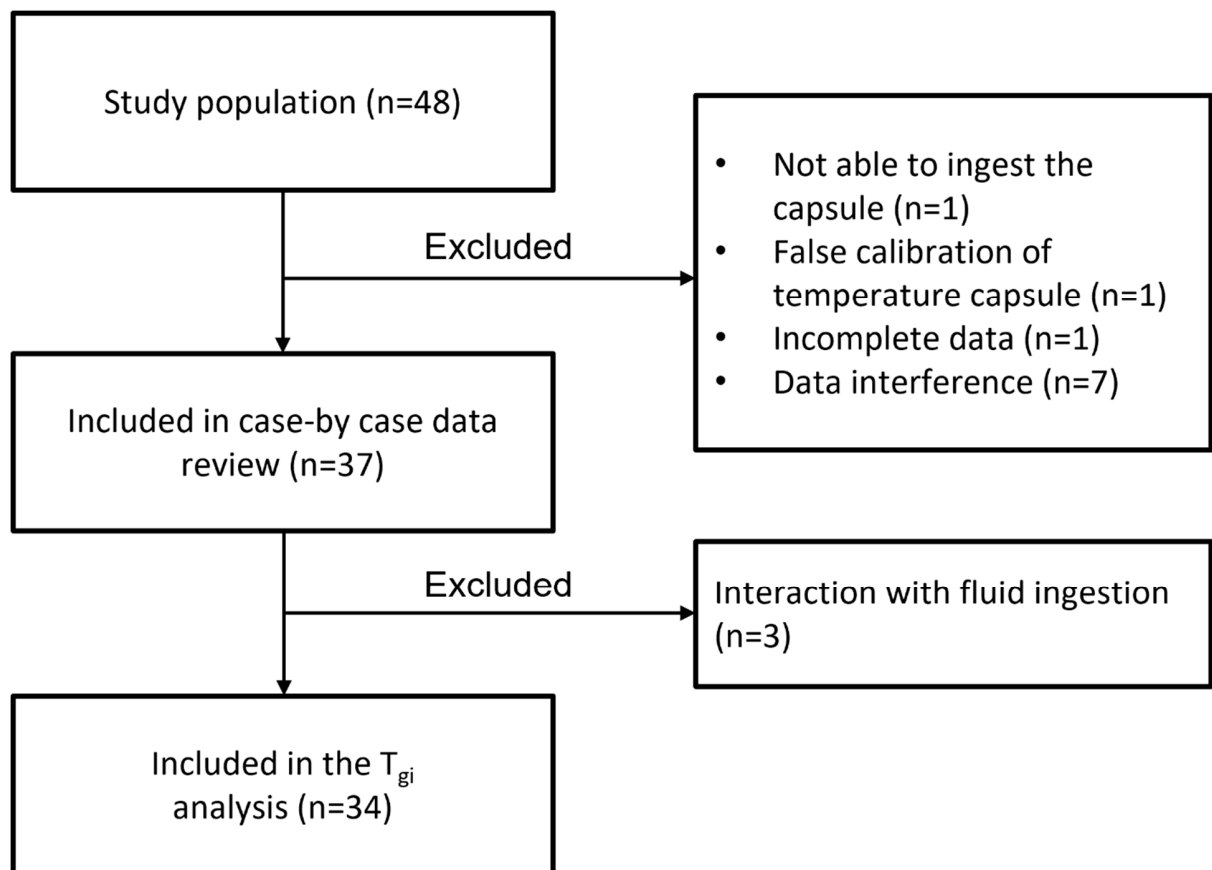

**Supplementary Figure S2.** Overview of the case-by-case review process of the  $T_{gi}$  data
